# Supplementary material
Source: PubMed Central journal article supplement (PMC4165355)

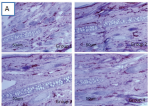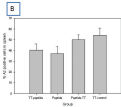

Supplement: NIHMS618316-supplement-01.pdf [file NIHMS618316-supplement-01.pdf]
